# Supplementary material
Source: bioRxiv or medRxiv preprint supplement (https://www.medrxiv.org/highwire/filestream/75405/field_highwire_adjunct_files/0/2020.04.02.20050674-1.pdf)
Supplement: Supplementary file [file 2020.04.02.20050674-1.pdf]

# Supplementary material

Matlab code fragments for model of COVID-19

Based on parameter values from Fang et al. (2020)

Parameters are set as follows:

```
Te=7;Ti=10.25;N0=10000000;K=10;
```

Discrete time SEIR model

Counts in SEI and R are held in vector X, where:

$$X' = [S \ E \ I \ R]$$

Projection matrix calculated:

```
II=X(3)
infect_r=beta0*K*(II/N0) ;
proj=[1-infect_r,0,0,0;
      infect_r,1-1/Te,0,0;
      0,1/Te,1-1/Ti,0;
      0,0,1/Ti,1];
```

Each time step iterates:

```
mat_covid_X;X=proj*X
```

Time explicit SEIR matrix model that tracks time within compartments and thus correctly recreates compartment residence time distributions

Age specific counts are held in vector

$$X2' = [S \ E1 \ E2 \ E3 \ E4 \ E5 \ E6 \ E7 \ I1 \ I2 \ I3 \ I4 \ I5 \ I6 \ I7 \ I8 \ I9 \ I10 \ I11 \ R]$$

Projection matrix calculated:

```
%X contains summed numbers in SEIR categories
II=X(3)
infect_r=beta0*K*(II/N0);

proj2=[1-infect_r,0,0,0,0,0,0,0,0,0,0,0,0,0,0,0,0,0,0,0;
infect_r,0,0,0,0,0,0,0,0,0,0,0,0,0,0,0,0,0,0,0;
0,1,0,0,0,0,0,0,0,0,0,0,0,0,0,0,0,0,0,0;
0,0,1,0,0,0,0,0,0,0,0,0,0,0,0,0,0,0,0,0;
0,0,0,1,0,0,0,0,0,0,0,0,0,0,0,0,0,0,0,0;
0,0,0,0,1,0,0,0,0,0,0,0,0,0,0,0,0,0,0,0;
0,0,0,0,0,1,0,0,0,0,0,0,0,0,0,0,0,0,0,0;
0,0,0,0,0,0,1,0,0,0,0,0,0,0,0,0,0,0,0,0;
0,0,0,0,0,0,0,1,0,0,0,0,0,0,0,0,0,0,0,0;
0,0,0,0,0,0,0,0,1,0,0,0,0,0,0,0,0,0,0,0;
0,0,0,0,0,0,0,0,0,1,0,0,0,0,0,0,0,0,0,0;
0,0,0,0,0,0,0,0,0,0,1,0,0,0,0,0,0,0,0,0;
0,0,0,0,0,0,0,0,0,0,0,1,0,0,0,0,0,0,0,0;
0,0,0,0,0,0,0,0,0,0,0,0,1,0,0,0,0,0,0,0;
0,0,0,0,0,0,0,0,0,0,0,0,0,1,0,0,0,0,0,0;
0,0,0,0,0,0,0,0,0,0,0,0,0,0,1,0,0,0,0,0;
0,0,0,0,0,0,0,0,0,0,0,0,0,0,0,1,0,0,0,0;
0,0,0,0,0,0,0,0,0,0,0,0,0,0,0,0,0.25,0,0;
0,0,0,0,0,0,0,0,0,0,0,0,0,0,0,0,0.75,1,1];
```

Each time step iterates:

```
X=[X2(1);sum(X2(2:8));sum(X2(9:19));X2(20)];
mat2_covid_final;X2=proj2*X2
```
